# Supplementary material for: A mechanistic understanding of microcolony morphogenesis: coexistence of mobile and sessile aggregates
Source: Royal Society of Chemistry journal article supplement (doi:10.1039/d2sm01365g), 2023-01-01
Supplement: d2sm01365g2.pdf [file d2sm01365g2.pdf]

Supplementary Information  
(A mechanistic understanding of microcolony morphogenesis:  
Coexistence of mobile and sessile aggregates)

Palash Bera, Abdul Wasim, and Pushpita Ghosh\*

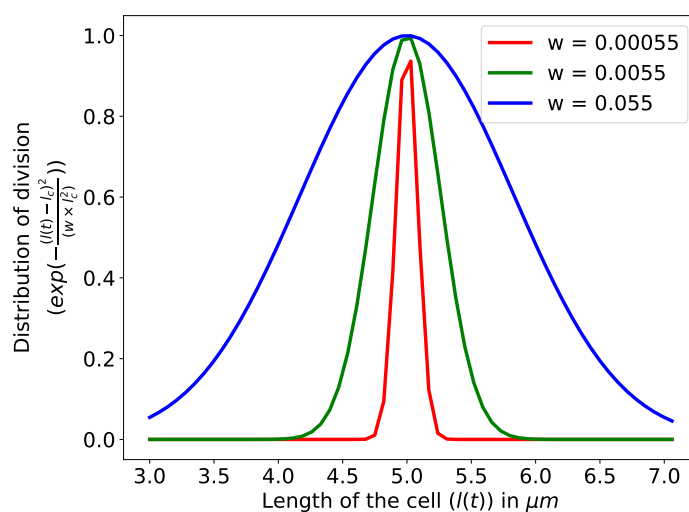

**Figure S1** Distribution of division as a function of cell length. For  $w = 0.0055$ , most of the cells will divide at  $l(t) = l_c$ , but there is also finite probability for dividing the cells at  $l_c > l(t) \lesssim 5.6$  or  $4.4 \gtrsim l(t) < l_c$ .

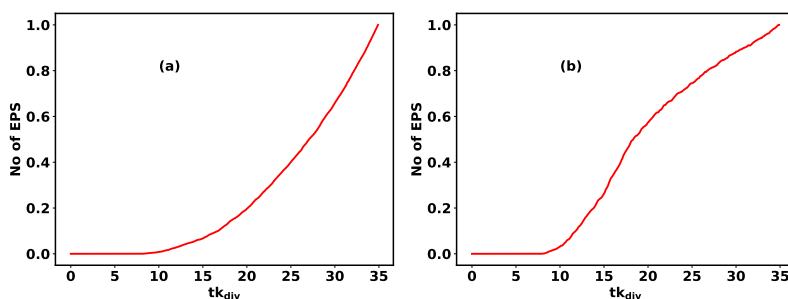

**Figure S2** (a) Number of EPS particles as a function of time for (a) the whole colony and (b) the particular circular region, respectively.

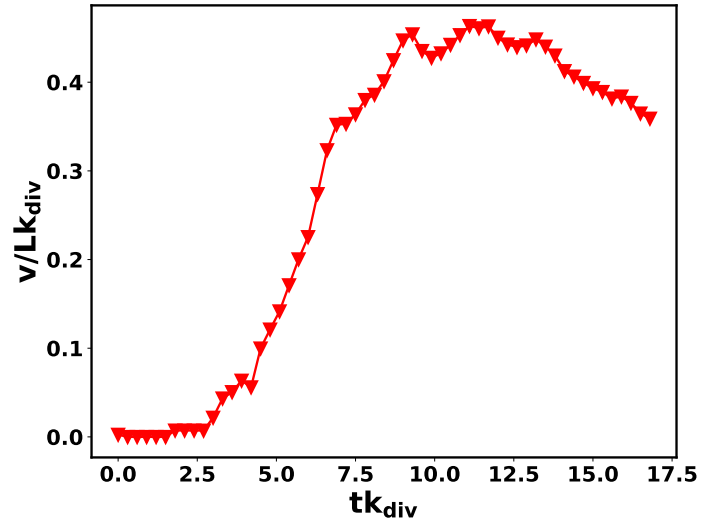

**Figure S3** Front speed as a function of time for the motile bacterial colony in absence of the nutrient reservoir.

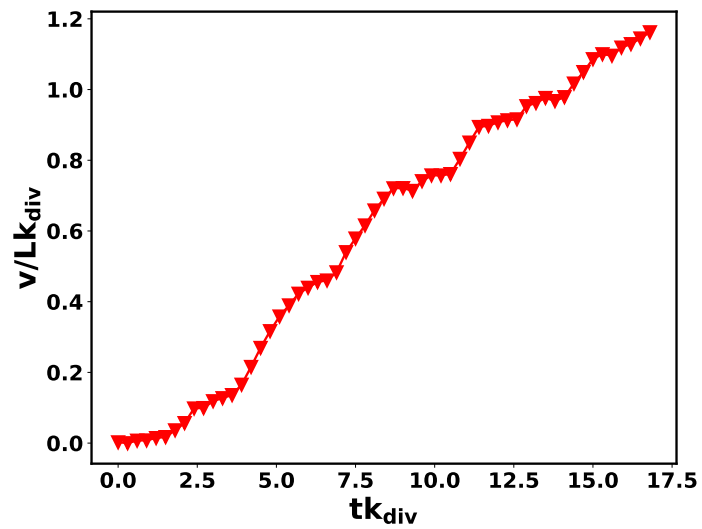

**Figure S4** Front speed as a function of time for the non-motile bacterial colony. There are few crests and troughs in the speed profile in some intervals which suggests weak oscillatory nature in the speed.

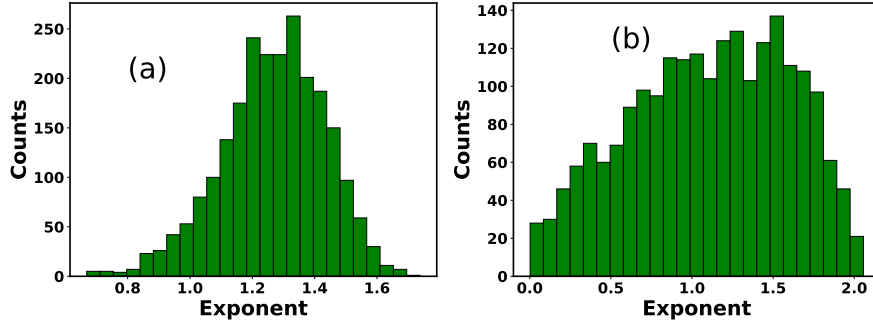

**Figure S5** Distribution of MSD exponents of cells in the presence of sticky EPS for a high initial nutrient concentration  $C_0 = 10.0 \text{ fg} \cdot \mu\text{m}^3$  for two different lag times: (a) small ( $\tau_1 k_{div}$ ) and (b) large ( $\tau_2 k_{div}$ ), respectively. For both cases more cells are showing sub-diffusion in two time scales in comparison with a low initial nutrient concentration  $C_0 = 3.0 \text{ fg} \cdot \mu\text{m}^3$ .

**Table S1** Parameters and constants used in our agent-based model

| Parameter                                | Symbol           | Simulations                                                           |
|------------------------------------------|------------------|-----------------------------------------------------------------------|
| Box area                                 | $L_x \times L_y$ | $800.0 \times 800.0 \mu\text{m}^2$                                    |
| Average length at division               | $l_c$            | $5.0 \mu\text{m}$                                                     |
| Diameter of cell                         | $d_o$            | $1.0 \mu\text{m}$                                                     |
| Diameter of EPS particle                 | $d_{eps}$        | $0.5 \mu\text{m}$                                                     |
| Linear growth rate                       | $\phi$           | $3.5 \mu\text{m}/\text{h}$                                            |
| Cell division rate                       | $k_{div}$        | $0.1 / \text{h}$                                                      |
| EPS production rate                      | $k_{eps}$        | $1.0 / \text{h}$                                                      |
| Elastic modulus (cell and EPS)           | E                | $2 \times 10^5 \text{ Pa}$                                            |
| Friction coefficient (cell)              | $\eta_{cell}$    | $200 \text{ Pa} \cdot \text{h}$                                       |
| Friction coefficient (EPS)               | $\eta_{eps}$     | $200 \text{ Pa} \cdot \text{h}$                                       |
| Nutrient concentration                   | $C_0$            | $3.0, 10.0, 20.0,$<br>and $30.0 \text{ fg} \cdot \mu\text{m}^3$       |
| Nutrient consumption rate                | k                | $4.0 / \text{h}$                                                      |
| Diffusion rate of nutrient               | D                | $300 \mu\text{m}^2/\text{h}$                                          |
| Threshold area-density of cell           | Cell [x, y]      | $8.0 \mu\text{m}^2$                                                   |
| Threshold area-density of EPS            | EPS[x, y]        | $0.3 \mu\text{m}^2$                                                   |
| Concentration cut off for EPS production | $C^*$            | $0.006 \text{ fg} \cdot \mu\text{m}^3$                                |
| Motility force                           | $f_{mot}$        | $100, 300,$<br>$500, \text{ and } 700 \text{ Pa} \cdot \mu\text{m}^2$ |
| Strength of attraction                   | $\epsilon$       | $18.0 \text{ Pa} \cdot \mu\text{m}^3$                                 |

## 1 Video

Video-S1 :-This video demonstrates that cells grow, divide, move, and secrete EPS in nearby areas depending upon the local accessibility of the nutrients and interact through mechanical forces to self-organize. Here initial nutrient concentration and motility force are  $C_0 = 3.0 fg \cdot \mu m^3$  and  $f_{mot} = 500 Pa \cdot \mu m^2$  respectively and all other parameters are the same as Table-S1. This video reveals the presence of apparently distinct phases of sessile aggregates and some motile cells within the colony's interior and mobile phases at the expanding periphery.
